# Supplementary material for: Increased PPARD Expression May Play a Protective Role in Human Lung Adenocarcinoma and Squamous Cell Carcinoma
Source: Hindawi journal article supplement (doi:10.1155/2022/9414524), 2022-03-15
Supplement: f1 [file 9414524.f1.pdf]

## Supplementary Data

The Supplementary Data is a multi-worksheet excel file that contains additional results described as follows.

- 1) Expression Analysis: The detailed results of the PPARD expression analysis in 11 LA datasets and 9 LSCC datasets that met the inclusion criteria.
- 2) Ref4\_LSCC\_PPARD Pathway: information regarding LSCC\_PPARD Pathway was presented, including the type of the relationship, supporting references, and related sentences from the references where the relationship has been identified.
- 3) Ref4\_LA\_PPARD\_Pathway: information regarding LA\_PPARD Pathway was presented, including the type of the relationship, supporting references, and related sentences from the references where the relationship has been identified.
- 4) PEA4LA\_Good: detailed information on all the PEA results that may inhibit the progress of LA
- 5) PEA4LA\_Bad: detailed information on all the PEA results that may promote the progress of LA.
- 6) PEA4LSCC\_Good: detailed information on all the PEA results that may inhibit the progress of LSCC

The excel file is online available at:

[www.gousinfo.com/database/Data\\_Genetic/PPARD\\_Lung\\_Cancer.xlsx](http://www.gousinfo.com/database/Data_Genetic/PPARD_Lung_Cancer.xlsx)
